# Supplementary material for: Micelle assisted synthesis of bismuth oxide nanoparticles for improved chemocatalytic degradation of toxic Congo red into non-toxic products
Source: Royal Society of Chemistry journal article supplement (doi:10.1039/d3nj04494g), 2023-11-17
Supplement: d3nj04494g1.pdf [file d3nj04494g1.pdf]

*Supporting information*

**Micelles assisted synthesis of bismuth oxide nanoparticles for chemocatalytic degradation of toxic Congo red into non-toxic**

Shreya Muthukumar<sup>1</sup>, Aleena Pious<sup>1</sup>, Dharshini Karnan Singaravelu<sup>1</sup>, Periyappan Nantheeswaran<sup>2</sup>, Mariappan Mariappan<sup>2</sup>, Aravind Sivasubramanian<sup>1</sup>, Fuad Ameen<sup>3</sup>, Marek Gancarz<sup>4,5</sup>, Anbazhagan Veerappan<sup>1\*</sup>

<sup>1</sup>School of Chemical and Biotechnology, SASTRA Deemed University, Thanjavur 613 401, Tamil Nadu, India

<sup>2</sup>Department of Chemistry, SRM University, Kattankulathur, Chennai, 603 203, Tamil Nadu, India

<sup>3</sup>Department of Botany and Microbiology, College of Science, King Saud University, Riyadh, 11451, Saudi Arabia

<sup>4</sup>Faculty of Production and Power Engineering, University of Agriculture in Krakow, Balicka 116B, 30 149 Krakow, Poland.

<sup>5</sup>Institute of Agrophysics, Polish Academy of Sciences, Doświadczalna 4, 20-290 Lublin, Poland

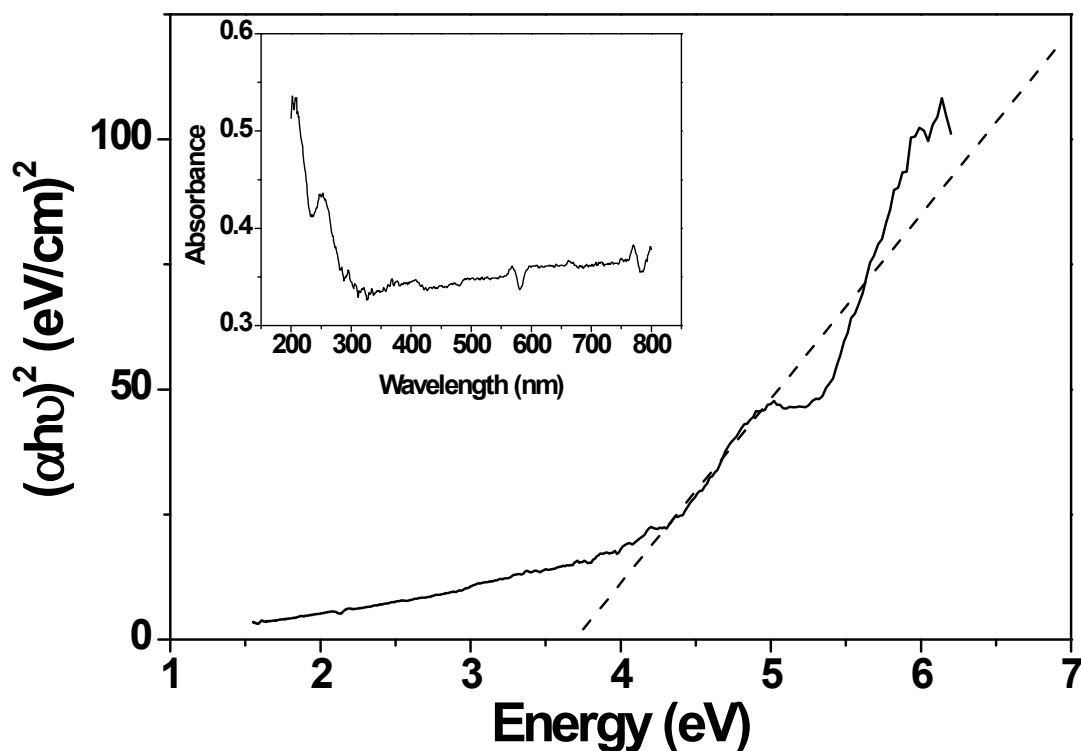

Figure S1: UV-vis-DRS spectra and Tauc's plot of Bi<sub>2</sub>O<sub>3</sub> NPs

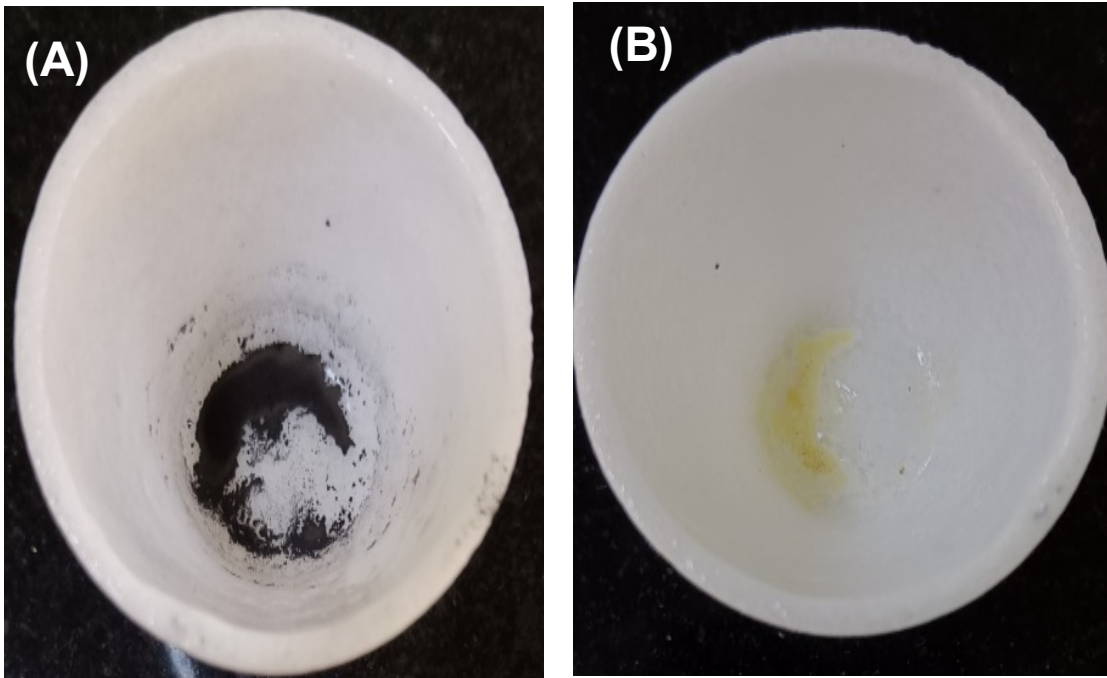

Figure S2:  $\text{Bi}_2\text{O}_3$  NPs (A) before and (B) after calcinations at  $500^\circ\text{C}$  for 6 h. Oxygen vacancies gave the material a black colour that turns fully oxygenated during calcinations and appear in the characteristic yellow colour of  $\text{Bi}_2\text{O}_3$  NPs.

**(A)**

|                                |                      |                           |                              |
|--------------------------------|----------------------|---------------------------|------------------------------|
| <b>Z-Average (d.nm):</b> 111.8 | <b>Peak 1:</b> 135.5 | <b>% Intensity:</b> 100.0 | <b>St Dev (d.n...)</b> 54.77 |
| <b>Pdl:</b> 0.177              | <b>Peak 2:</b> 0.000 | <b>% Intensity:</b> 0.0   | <b>St Dev (d.n...)</b> 0.000 |
| <b>Intercept:</b> 0.938        | <b>Peak 3:</b> 0.000 | <b>% Intensity:</b> 0.0   | <b>St Dev (d.n...)</b> 0.000 |

**Result quality : Good**

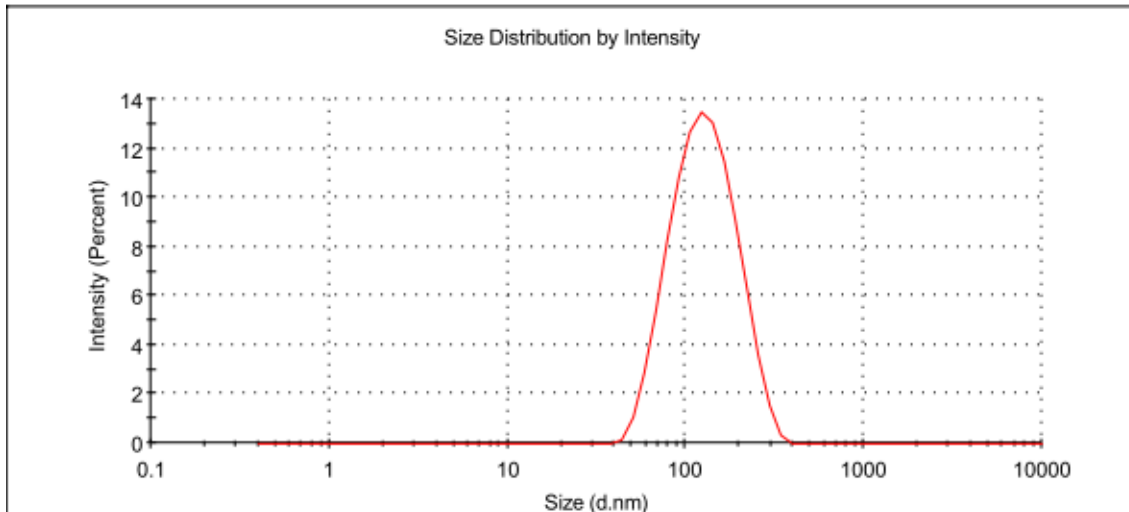

**(B)**

|                                    |                      |                       |                         |
|------------------------------------|----------------------|-----------------------|-------------------------|
| <b>Zeta Potential (mV):</b> -19.8  | <b>Mean (mV)</b>     | <b>Area (%)</b>       | <b>St Dev (mV)</b>      |
| <b>Zeta Deviation (mV):</b> 9.15   | <b>Peak 1:</b> -19.8 | <b>Area (%)</b> 100.0 | <b>St Dev (mV)</b> 9.40 |
| <b>Conductivity (mS/cm):</b> 0.132 | <b>Peak 2:</b> 0.00  | <b>Area (%)</b> 0.0   | <b>St Dev (mV)</b> 0.00 |
|                                    | <b>Peak 3:</b> 0.00  | <b>Area (%)</b> 0.0   | <b>St Dev (mV)</b> 0.00 |

**Result quality : Good**

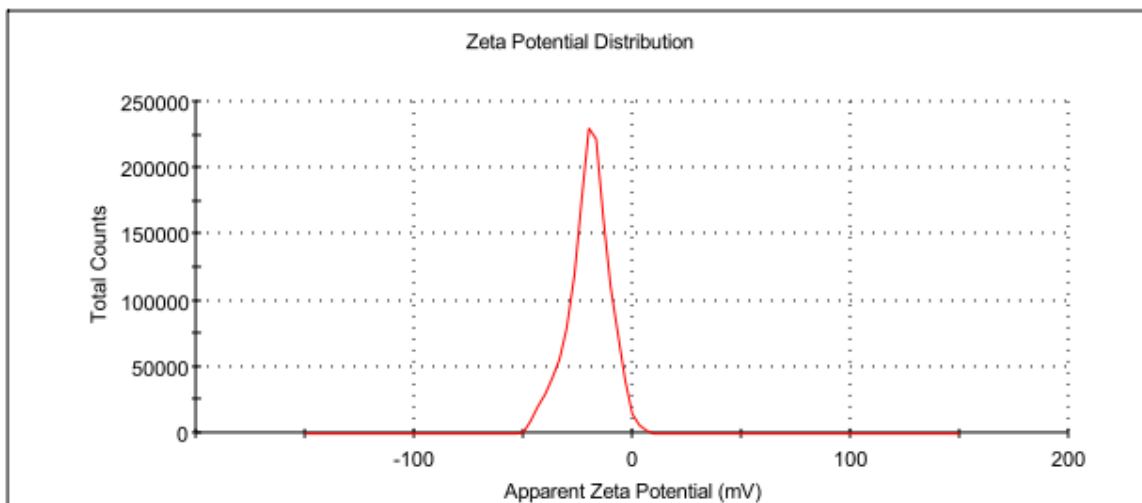

Figure S3: (A) Zeta size and (B) Zeta potential of Bi<sub>2</sub>O<sub>3</sub> NPs.

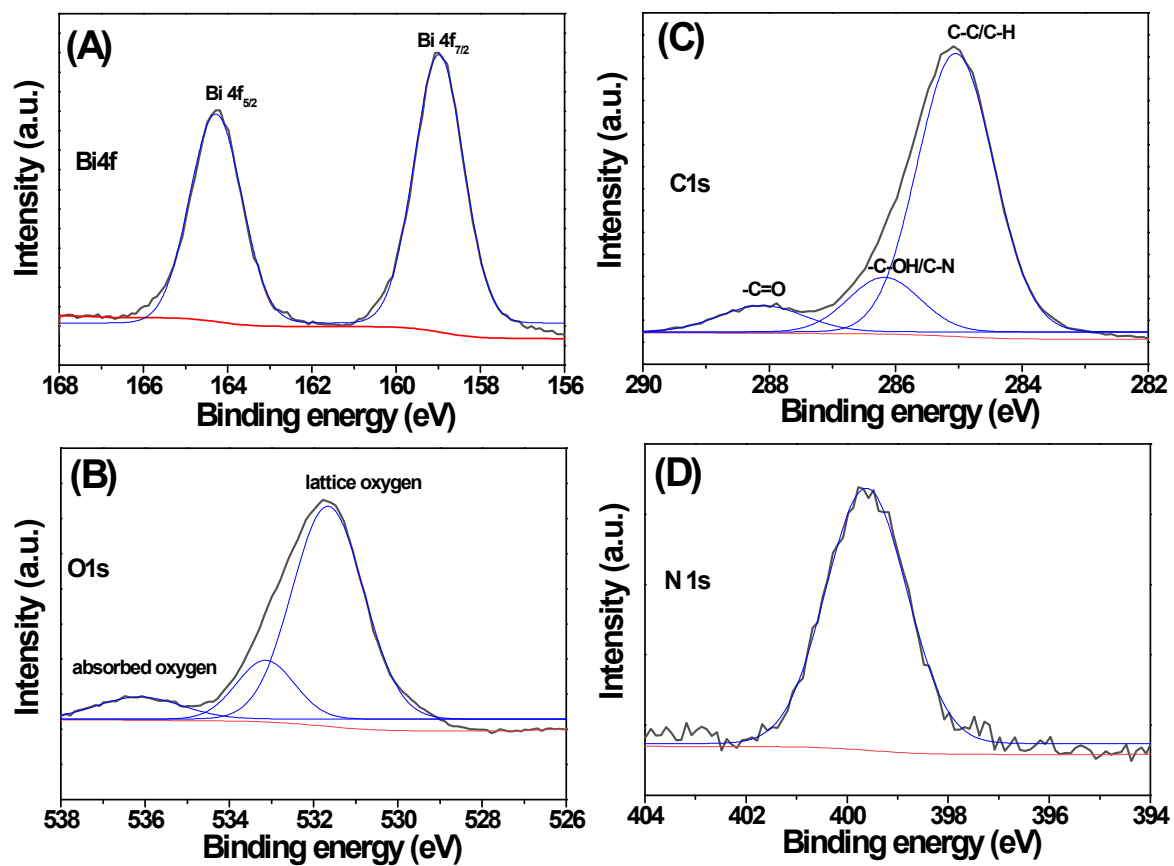

Figure S4: XPS spectra of (A) Bi4f, (B) O1s, (C) C1s, and (D) N1s.

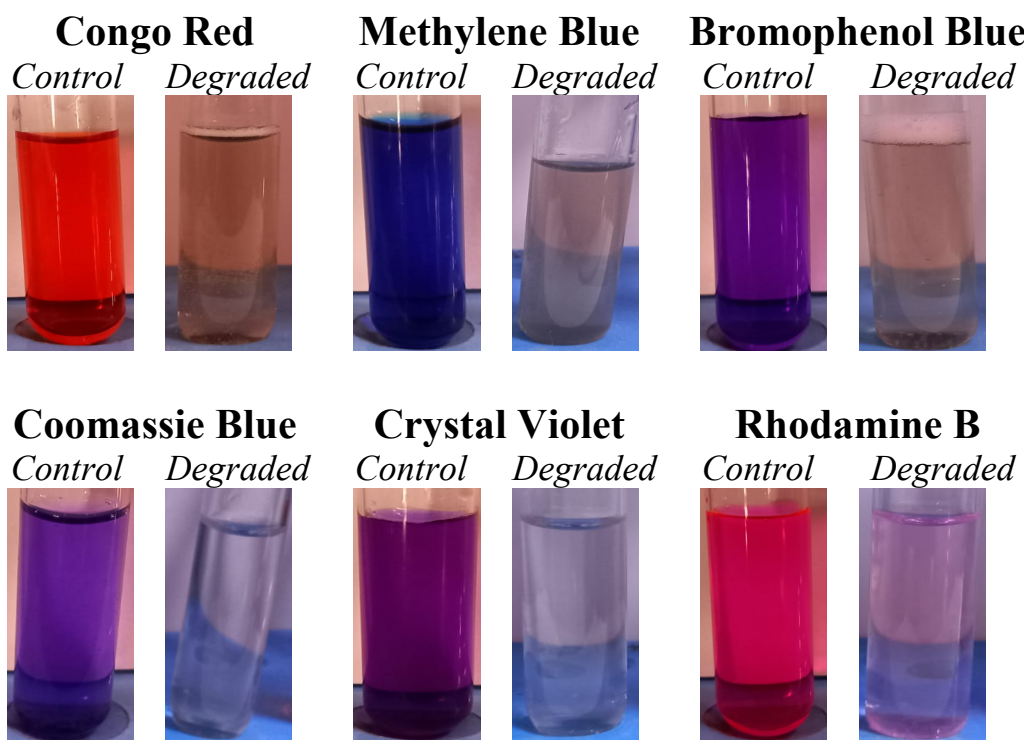

Figure S5:  $\text{Bi}_2\text{O}_3$  NPs catalyzed reduction of dyes. Dyes are treated with  $\text{NaBH}_4$  in the presence of  $\text{Bi}_2\text{O}_3$  NPs. Decolourization suggests that the dyes are degraded.

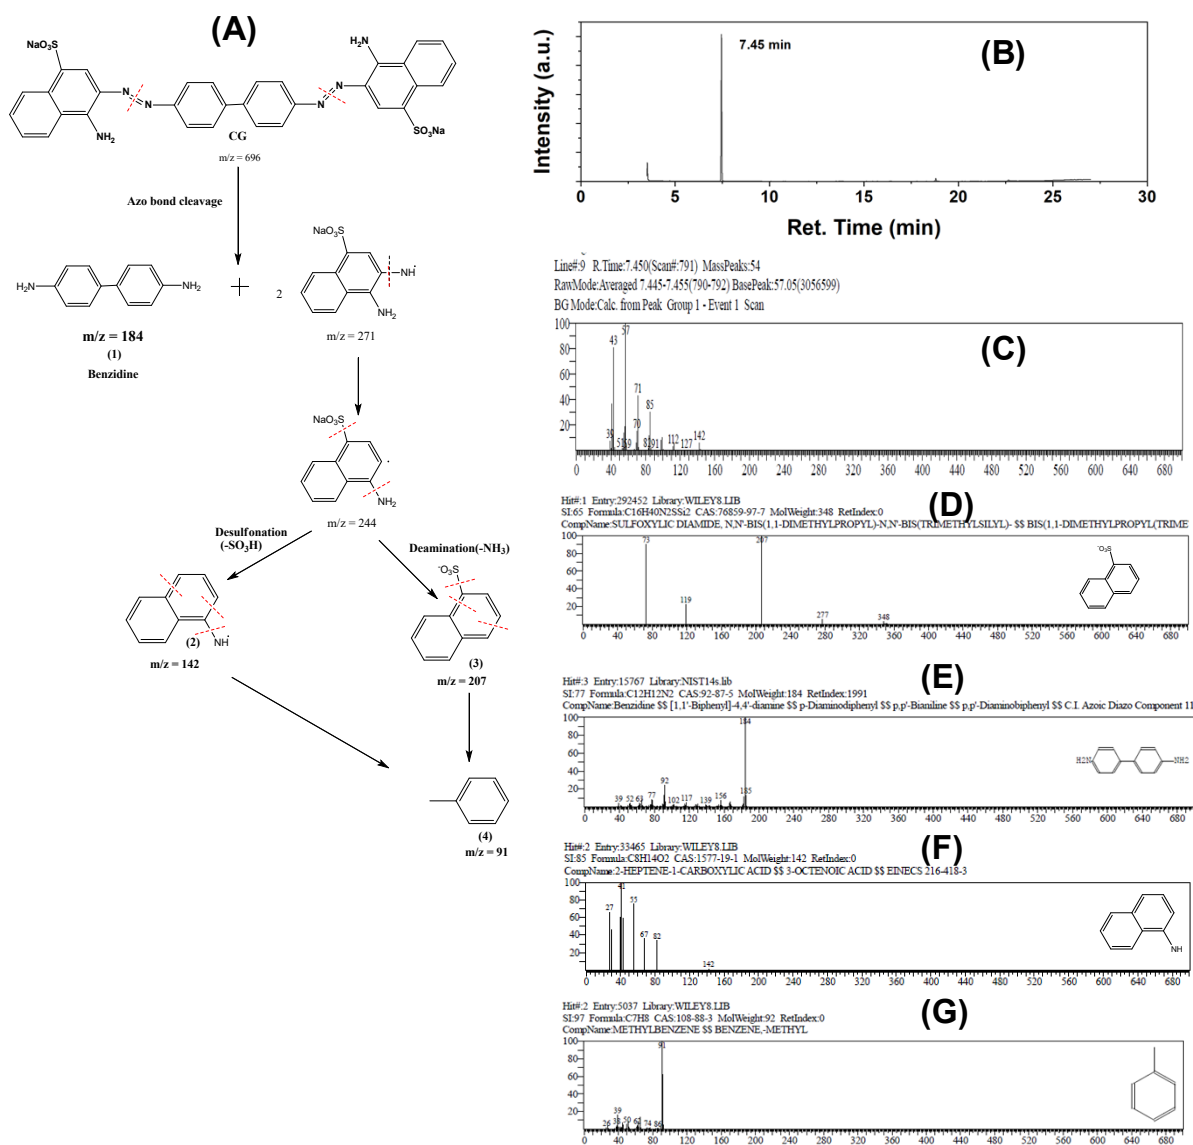

Figure S6: (A) Plausible products formed during degradation. (B) Gas chromatogram of degraded Congo red. (C) Mass profile for the peak at 7.45 min. (C-G) GC-MS of degraded congo red was compared with Wiley library and its matches. The finding suggests the Bi<sub>2</sub>O<sub>3</sub> NPs catalyzed NaBH<sub>4</sub> mediated reduction yields smaller molecules from Congo red, as a result the degraded product becomes non-toxic.

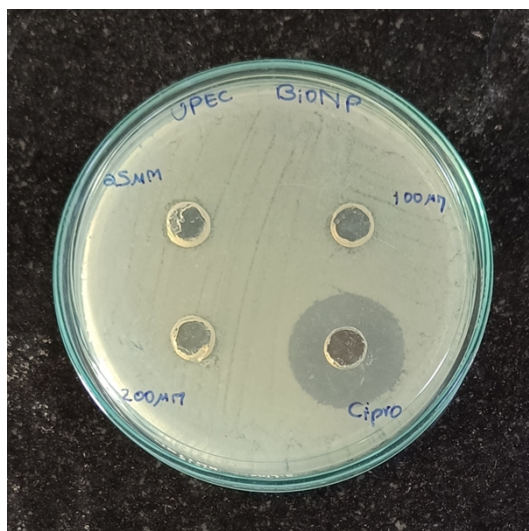

Figure S7: Zone of inhibition assay. About 0.1 OD bacterial cultures were swabbed on an LB-agar plate, and a well was created. 50  $\mu\text{L}$  of  $\text{Bi}_2\text{O}_3$  NPs were added to each well and incubated at 37°C for 12 h. 3  $\mu\text{M}$  ciprofloxacin was used as a positive control. The formation of a zone around the well demonstrates the toxicity of the loaded molecules. It is noted that the zone was observed around the well with ciprofloxacin, whereas no zone is found around the wells loaded with different concentrations of  $\text{Bi}_2\text{O}_3$  NPs. The findings indicate that  $\text{Bi}_2\text{O}_3$  NPs are non-toxic to bacteria.
